# Supplementary material for: Assessing the Precision of Radon Measurements from Beta-Attenuation Monitors
Source: MDPI journal article supplement (doi:10.3390/atmos15010083), 2024-01-09
Supplement: s1 [file s1]

Archive with 1 entries (1 files):
- atmosphere-2724276-supplementary.pdf
