# Supplementary material for: Assessing the Precision of Radon Measurements from Beta-Attenuation Monitors
Source: MDPI journal article supplement (doi:10.3390/atmos15010083), 2024-01-09
Supplement: s1 [file s1 › atmosphere-2724276-supplementary.pdf]

# Assessing the precision of radon measurements from beta-attenuation monitors

Matthew L. Riley, Ningbo Jiang, Gunaratnam Gunashanhar and Scott Thompson

<sup>1</sup> New South Wales Department of Planning and Environment; matthew.riley@environment.nsw.gov.au; ningbo.jiang@environment.nsw.gov.au; gunaratnam.gunashanhar@environment.nsw.gov.au; scott.thompson@environment.nsw.gov.au

\* Correspondence: matthew.riley@environment.nsw.gov.au

## S1. Chullora – Correlations and linear regression modelling for different meteorological conditions

Here we provide additional plots that extend the correlation and linear regression modelling presented in the paper. The plots include correlations and linear regression modelling for each decile of temperature, humidity, wind speed, sigma theta and wind direction.

Chullora radon comparison - by temperature

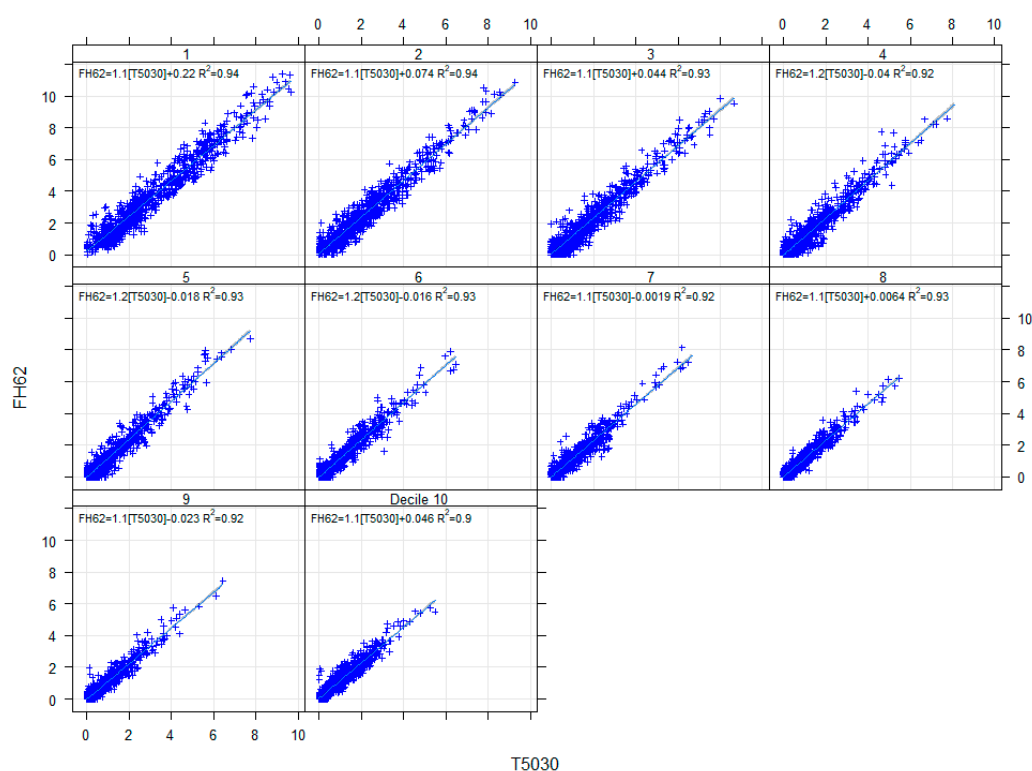

Figure S1 Correlations and linear regression modelling for temperature deciles 5030 vs FH62.

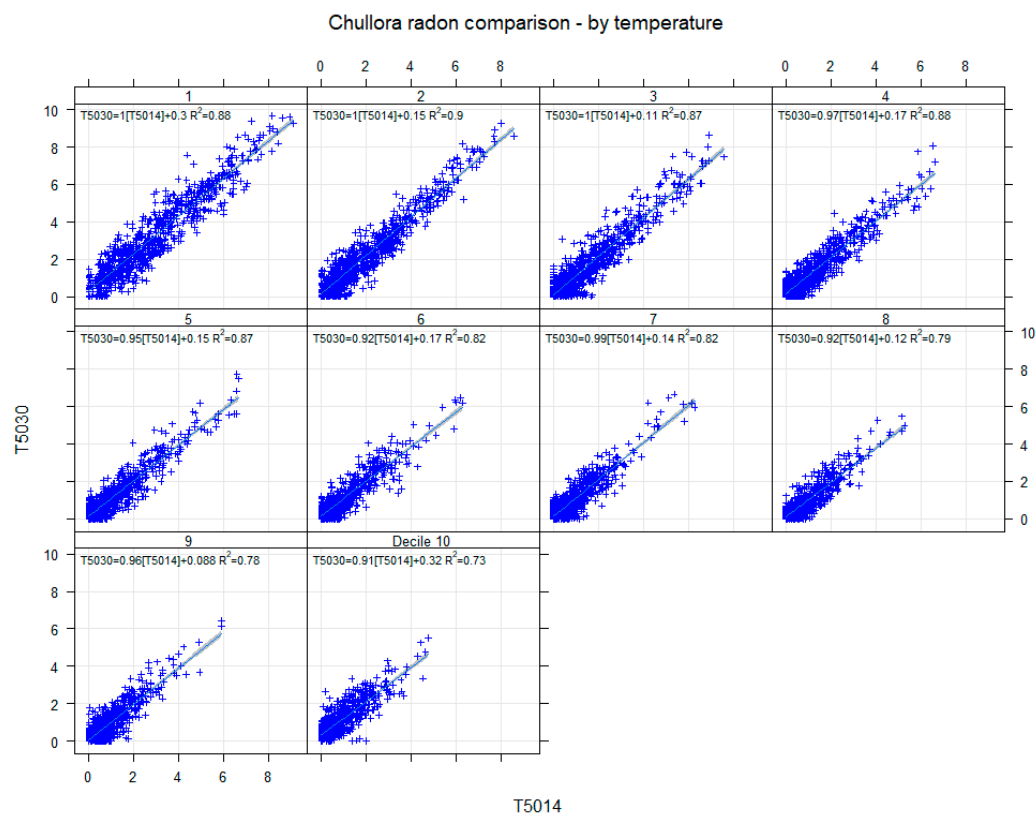

**Figure S2.** Correlations and linear regression modelling for temperature deciles 5030 vs 5014i.

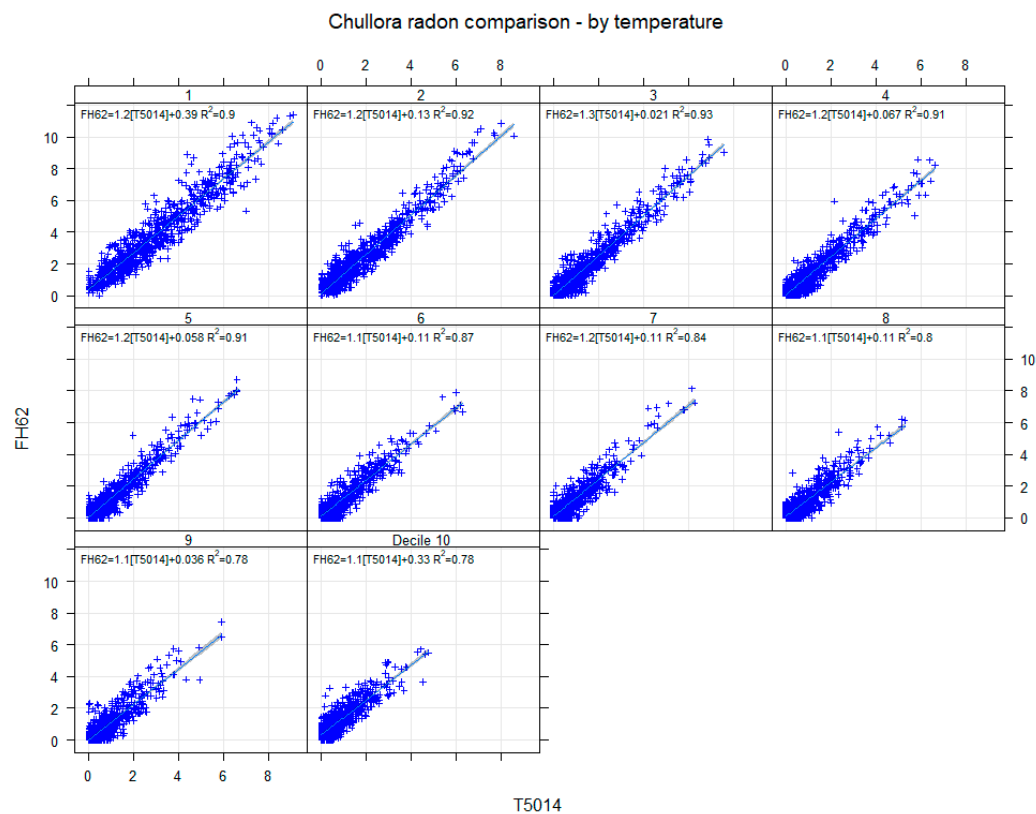

**Figure S3.** Correlations and linear regression modelling for temperature deciles FH62 vs 5014i.

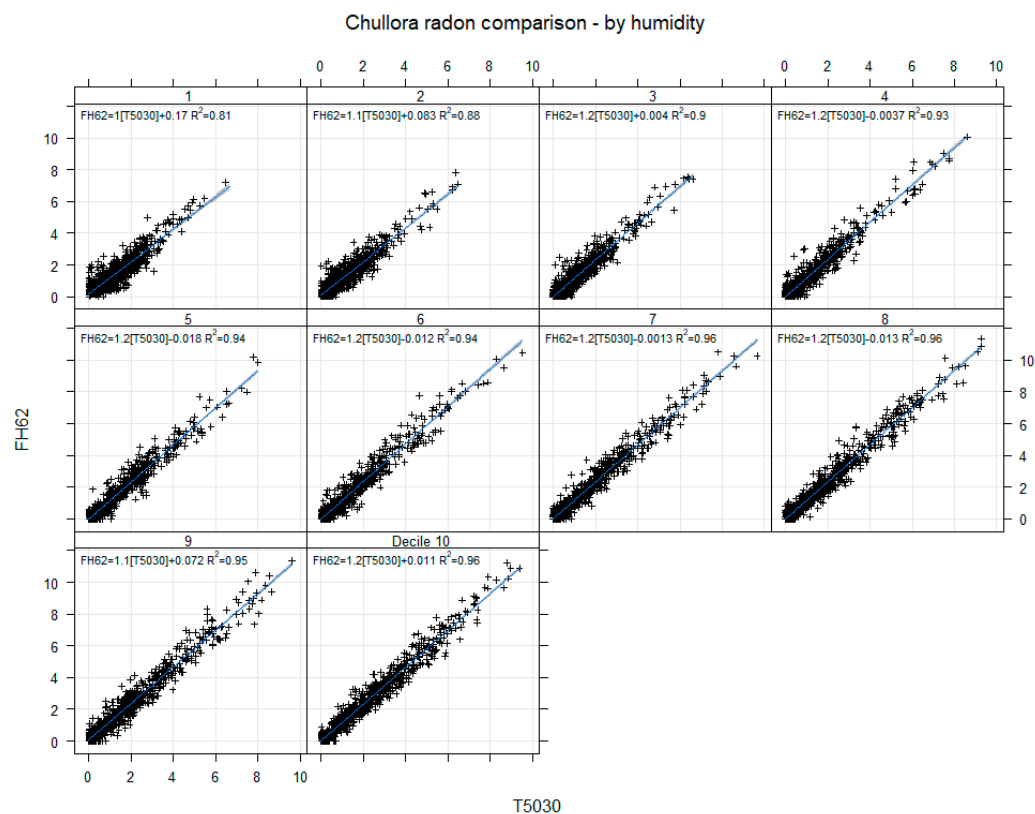

**Figure S4** Correlations and linear regression modelling for relative humidity deciles 5030 vs FH62.

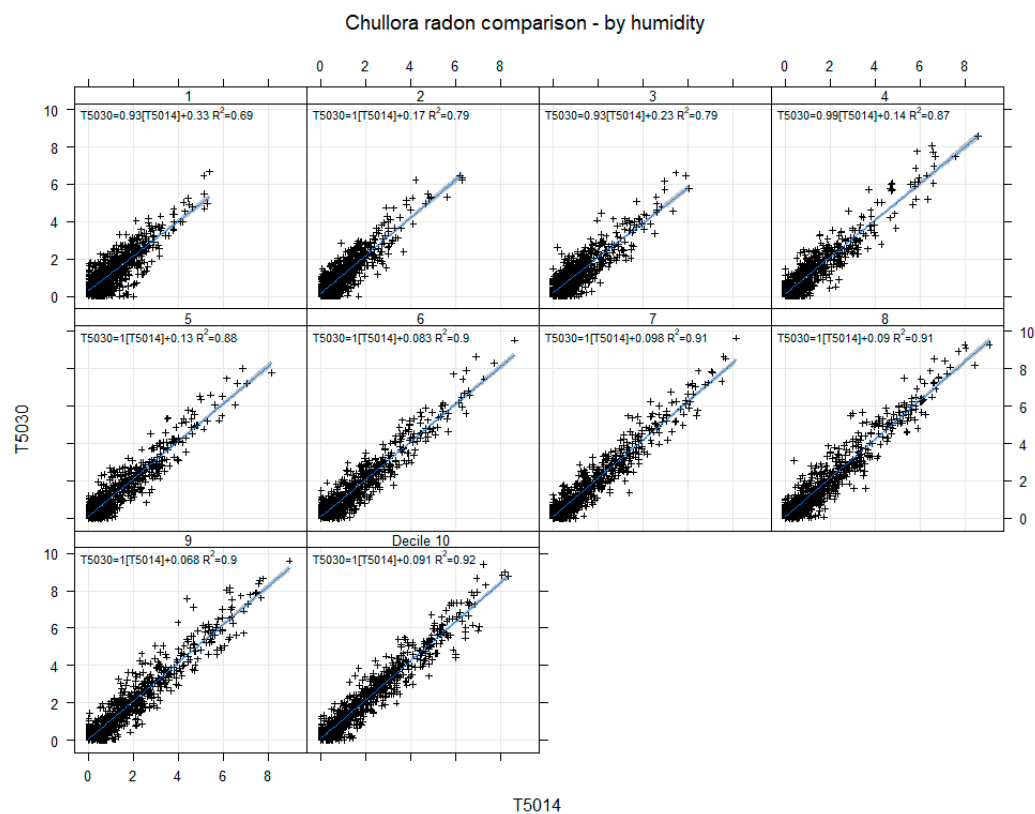

**Figure S5.** Correlations and linear regression modelling for relative humidity deciles 5030 vs 5014i.

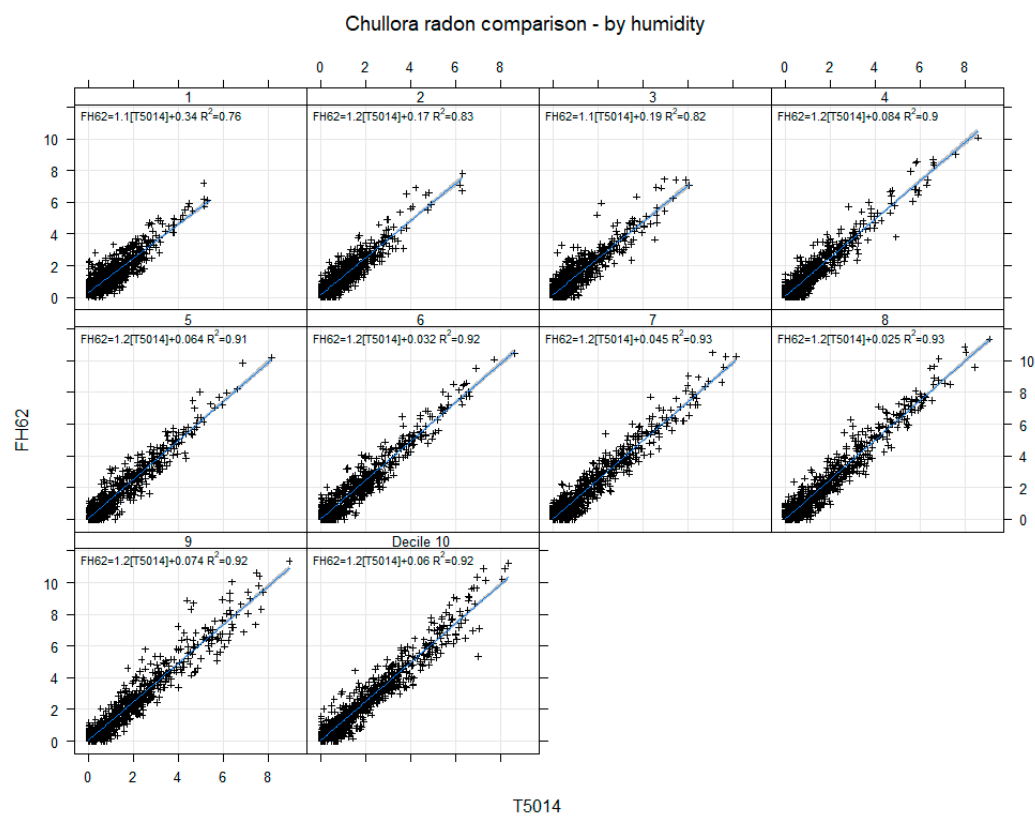

**Figure S6.** Correlations and linear regression modelling for relative humidity deciles FH62 vs 5014i.

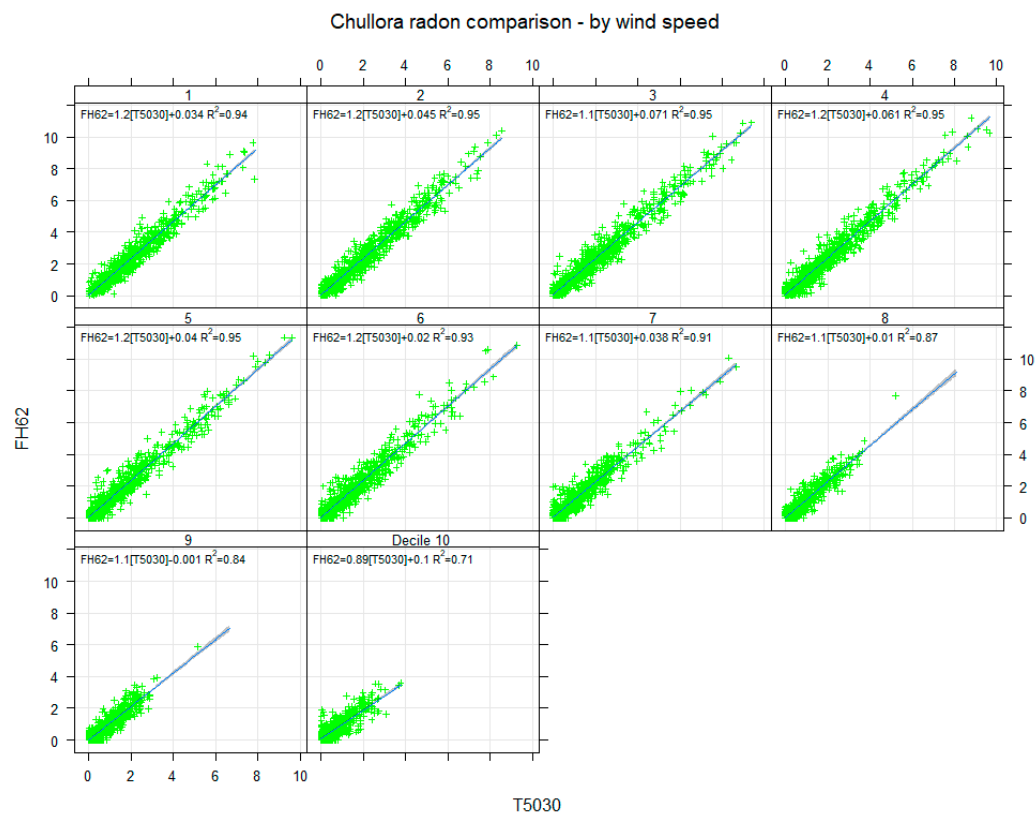

**Figure S7** Correlations and linear regression modelling for wind speed deciles 5030 vs FH62.

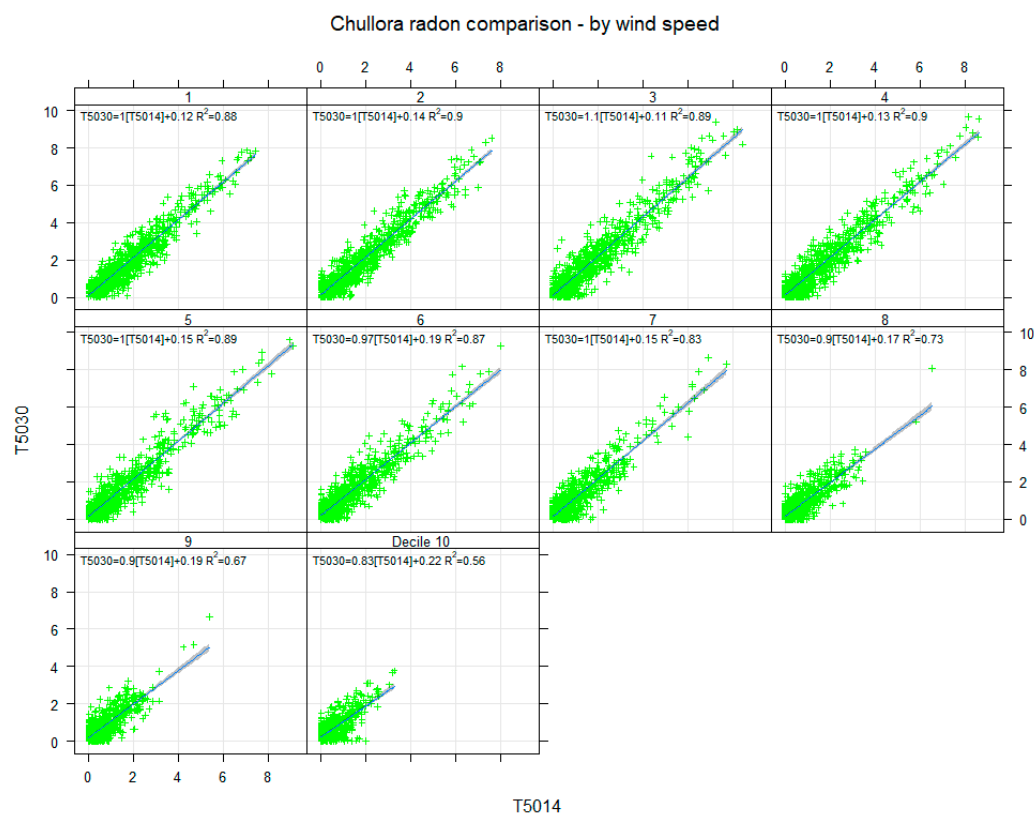

**Figure S8.** Correlations and linear regression modelling for wind speed deciles 5030 vs 5014i.

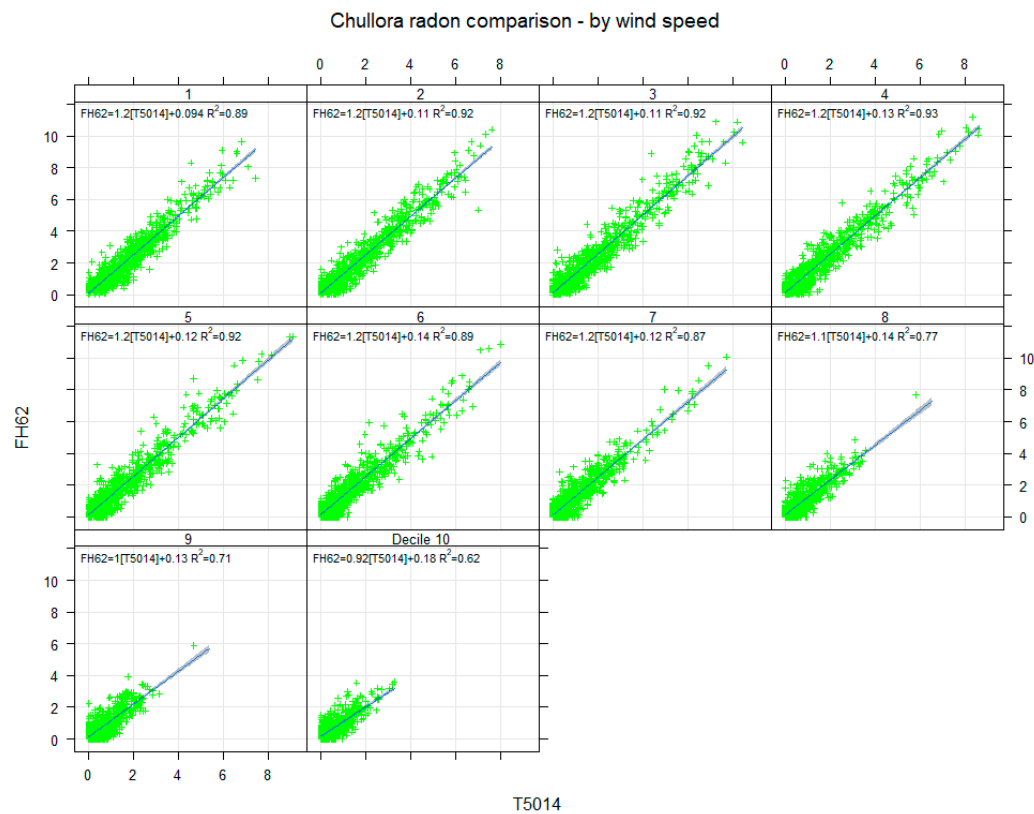

**Figure S9.** Correlations and linear regression modelling for wind speed deciles FH62 vs 5014i.

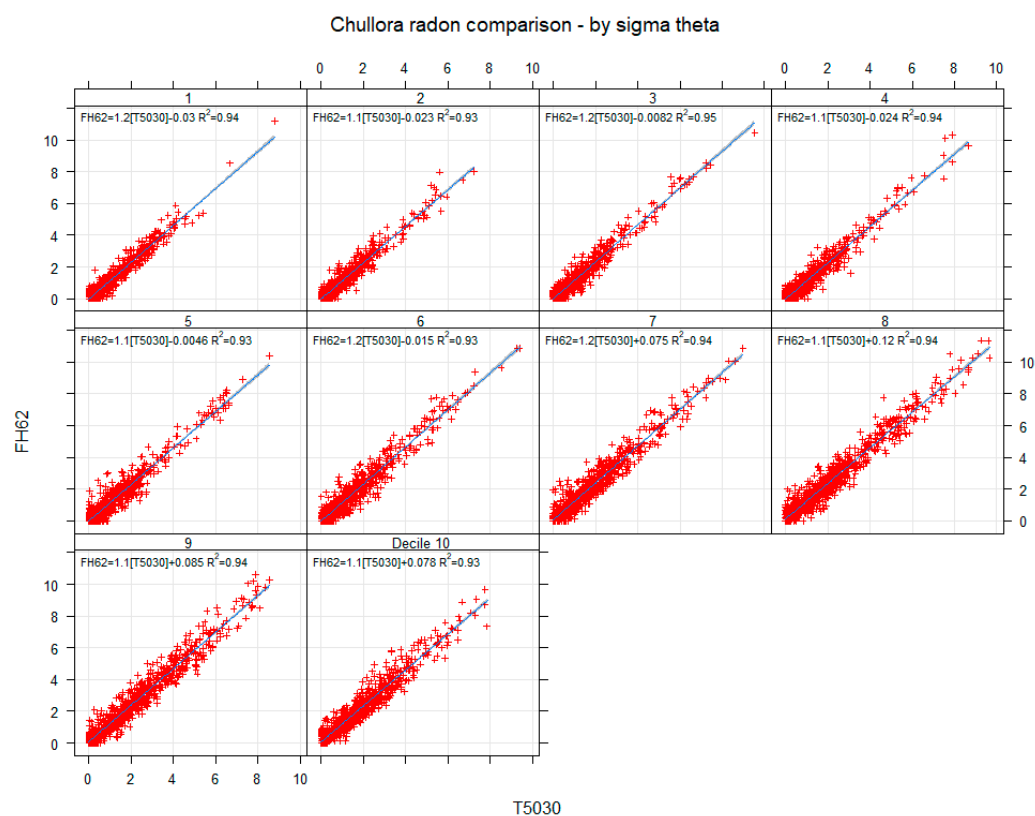

**Figure S10** Correlations and linear regression modelling for sigma theta deciles 5030 vs FH62.

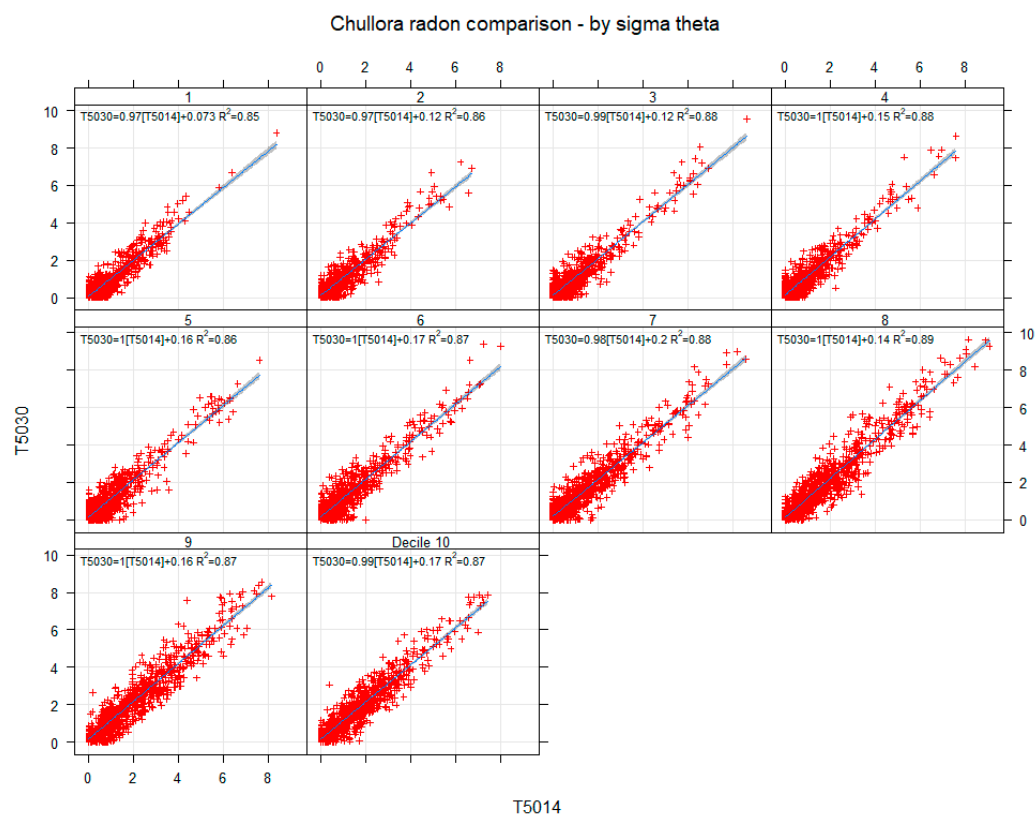

**Figure S11.** Correlations and linear regression modelling for sigma theta deciles 5030 vs 5014i.

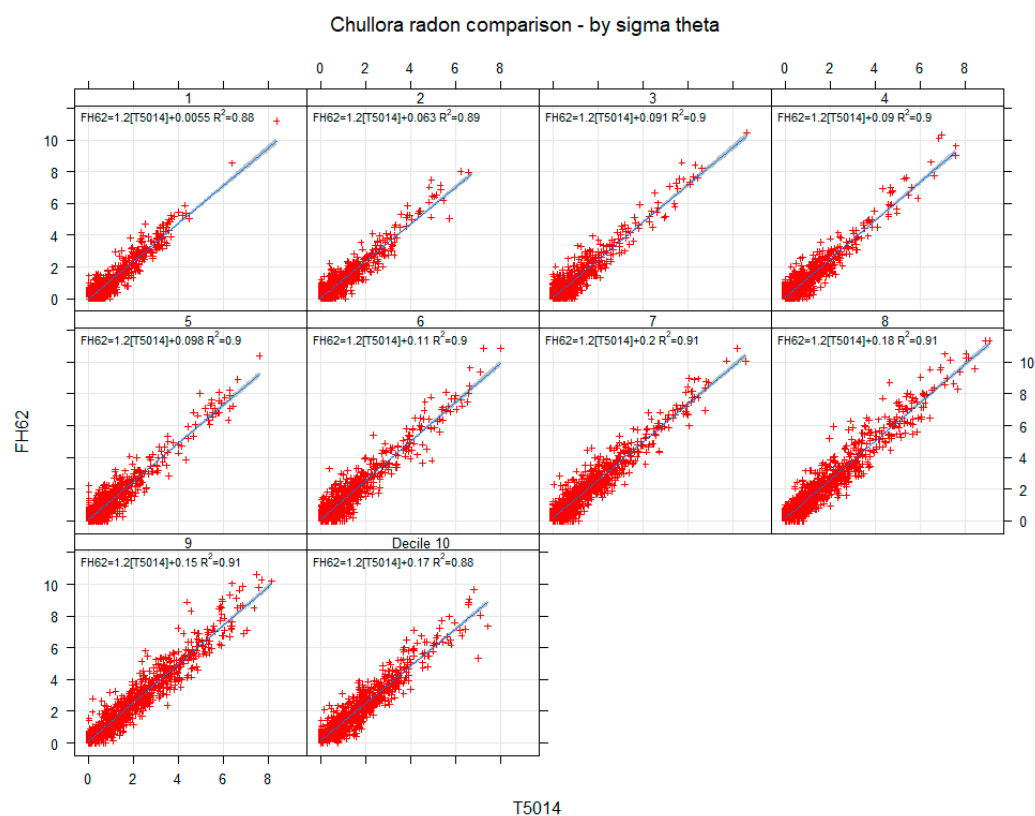

**Figure S12.** Correlations and linear regression modelling for sigma theta deciles FH62 vs 5014i.

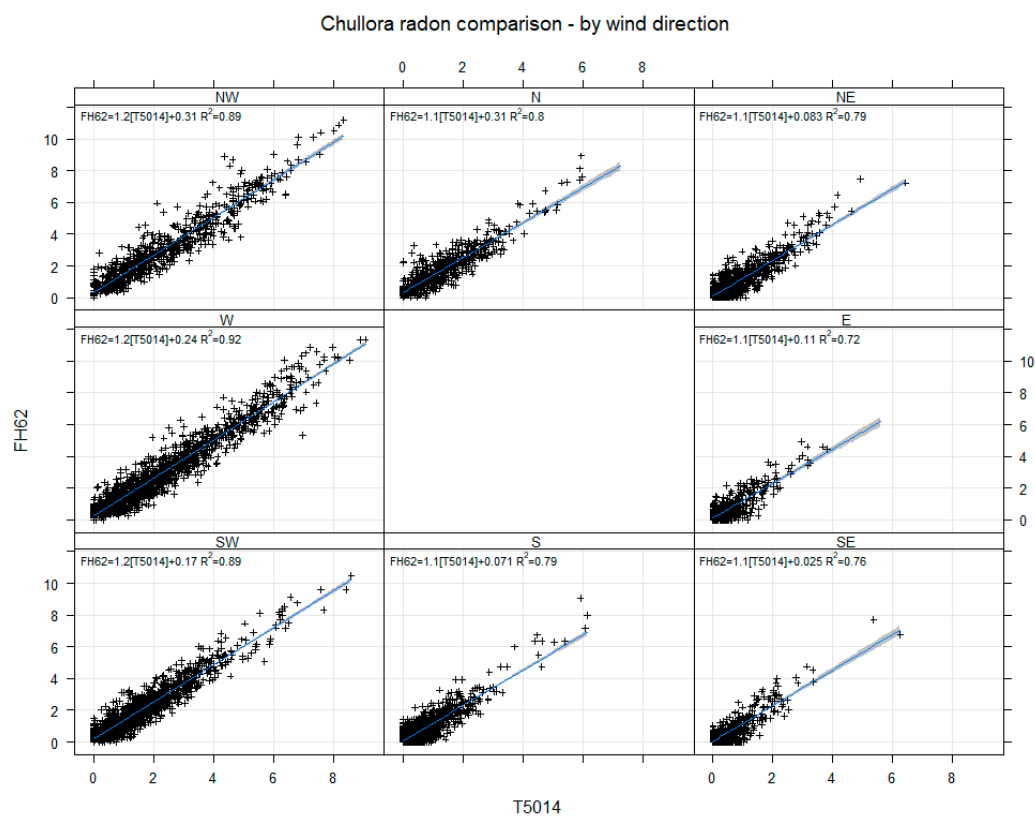

**Figure S13.** Correlations and linear regression modelling for wind direction FH62 vs 5014i.

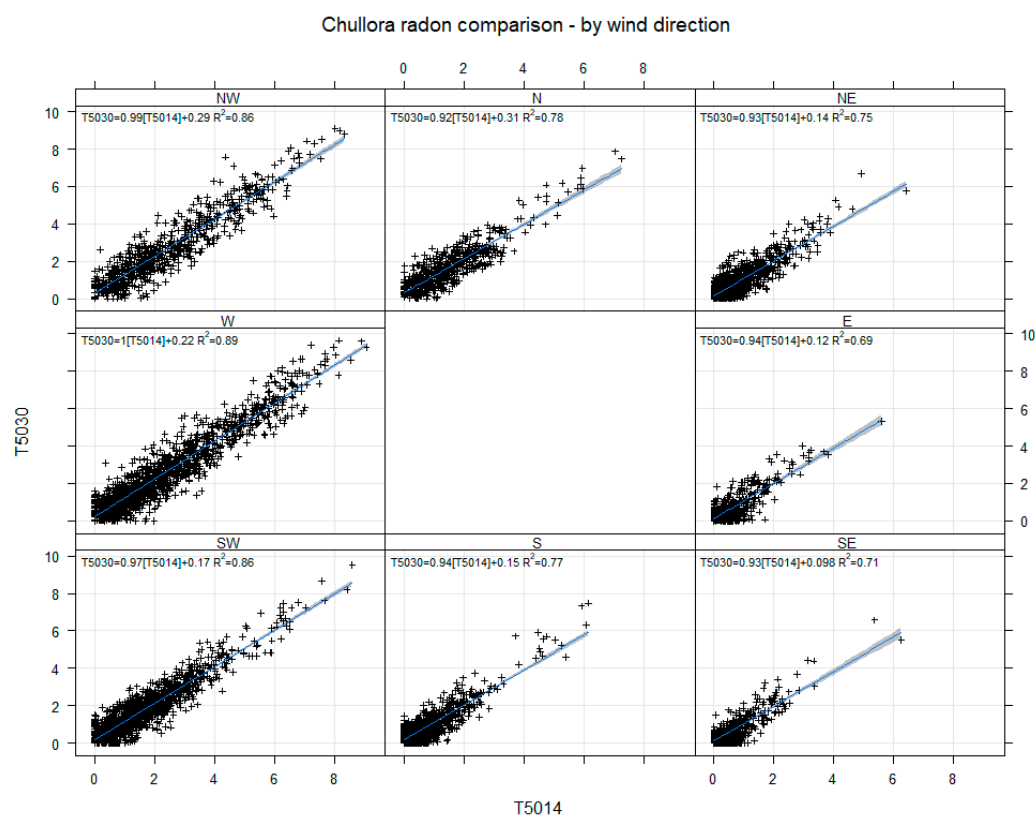

**Figure S14.** Correlations and linear regression modelling for wind direction 5030 vs 5014i.

## S2. Muswellbrook – Correlations and linear regression modelling

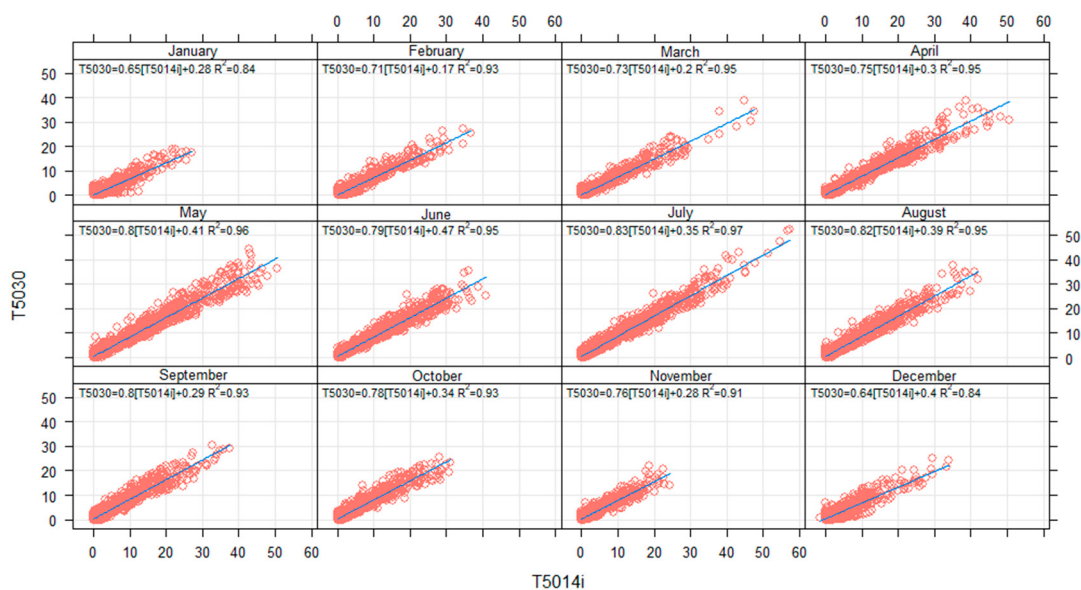

**Figure S15.** Monthly correlations of hourly average radon measurements ( $\text{Bqm}^{-3}$ ) between the 5030 and 5014i at Muswellbrook.

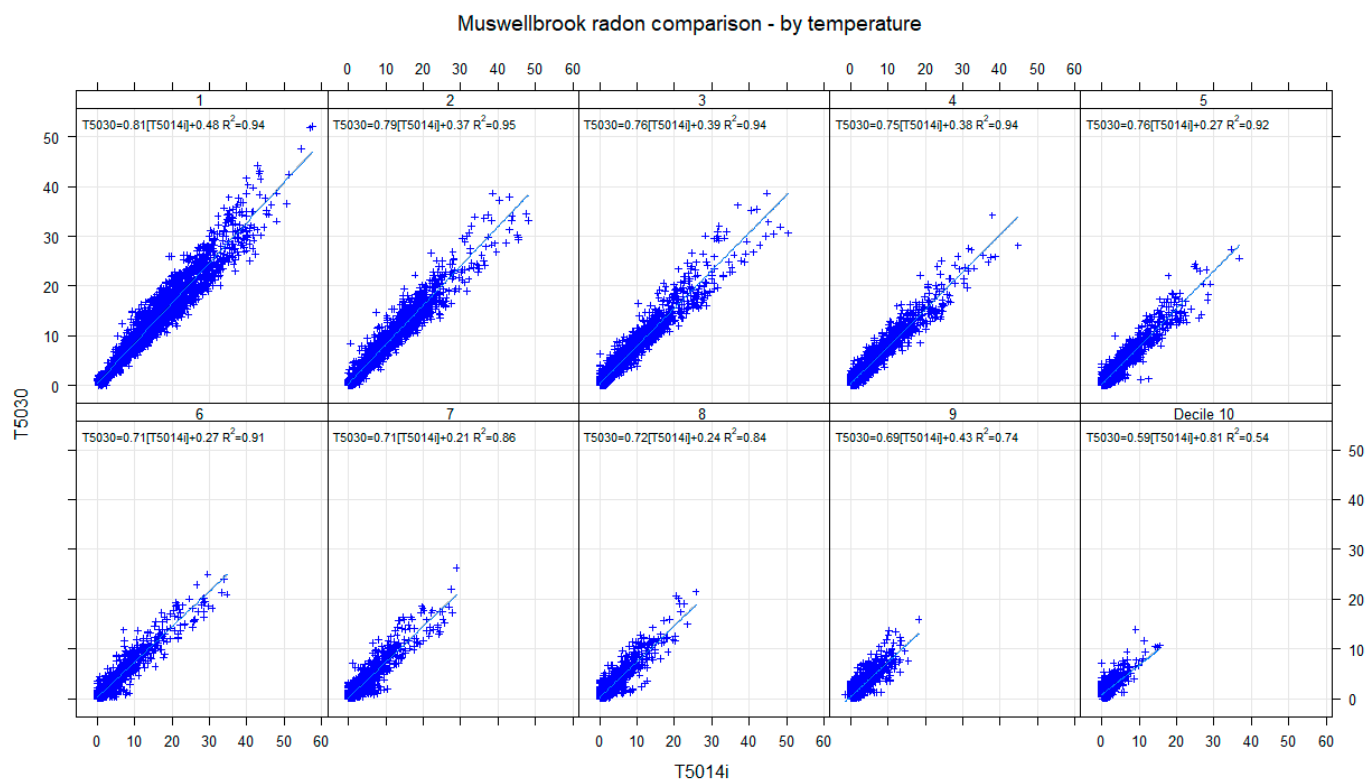

Figure S16. Correlations and linear regression modelling for temperature deciles 5030 vs 5014i.

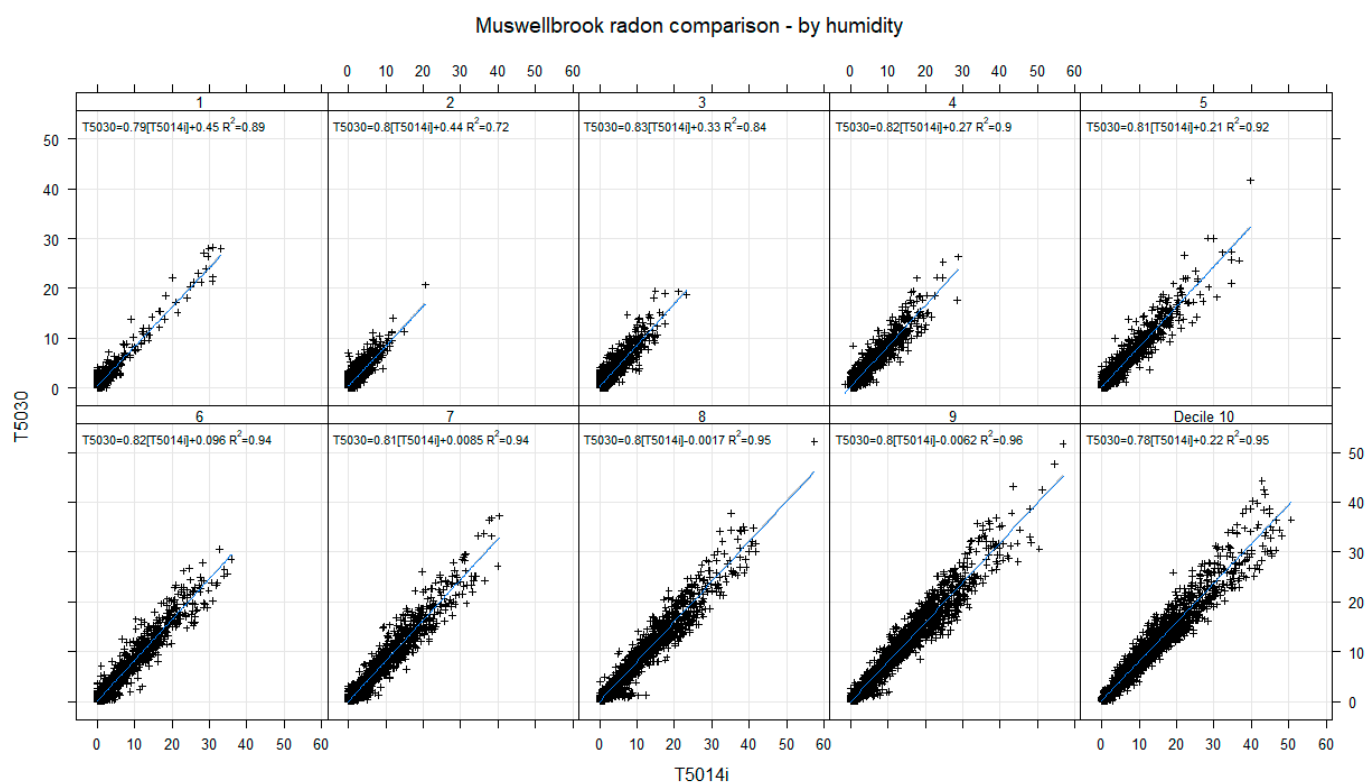

Figure S17. Correlations and linear regression modelling for humidity deciles 5030 vs 5014i.

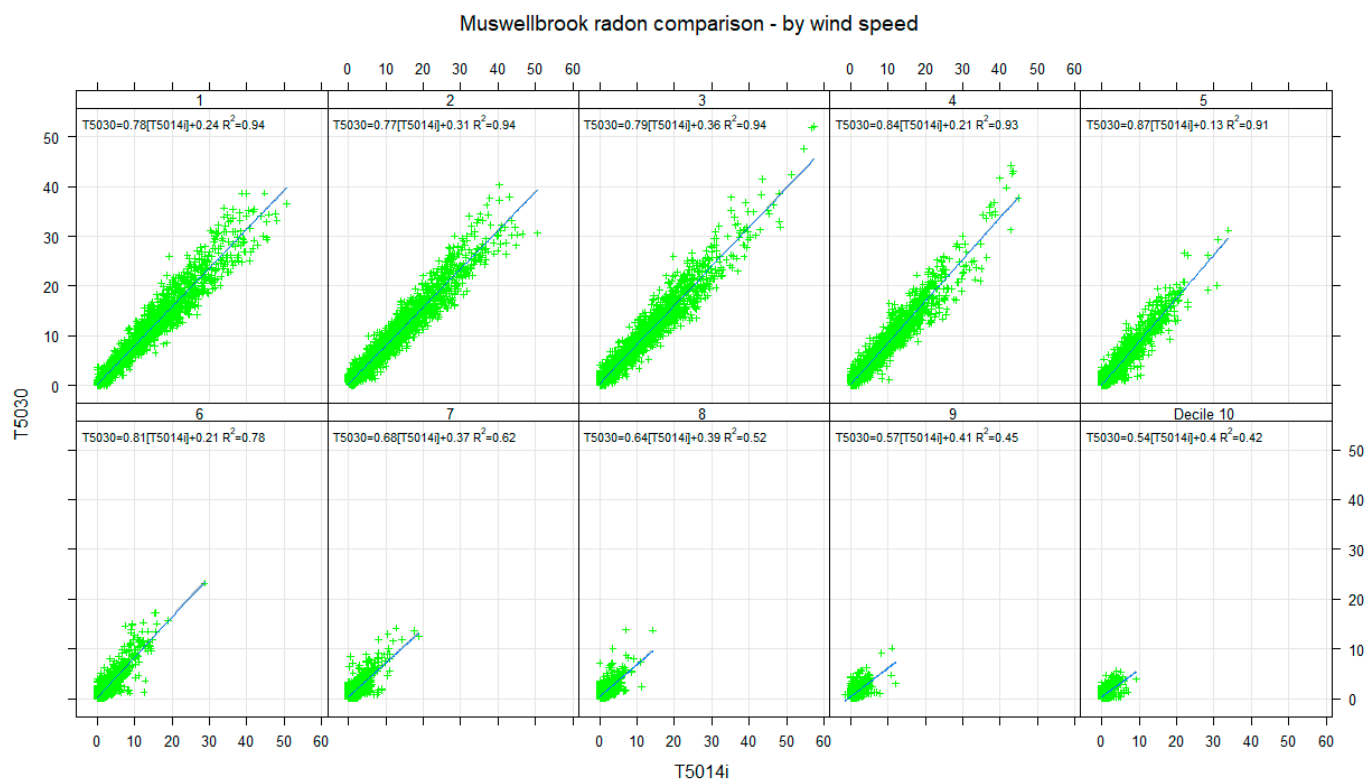

**Figure S18.** Correlations and linear regression modelling for wind speed deciles 5030 vs 5014i.

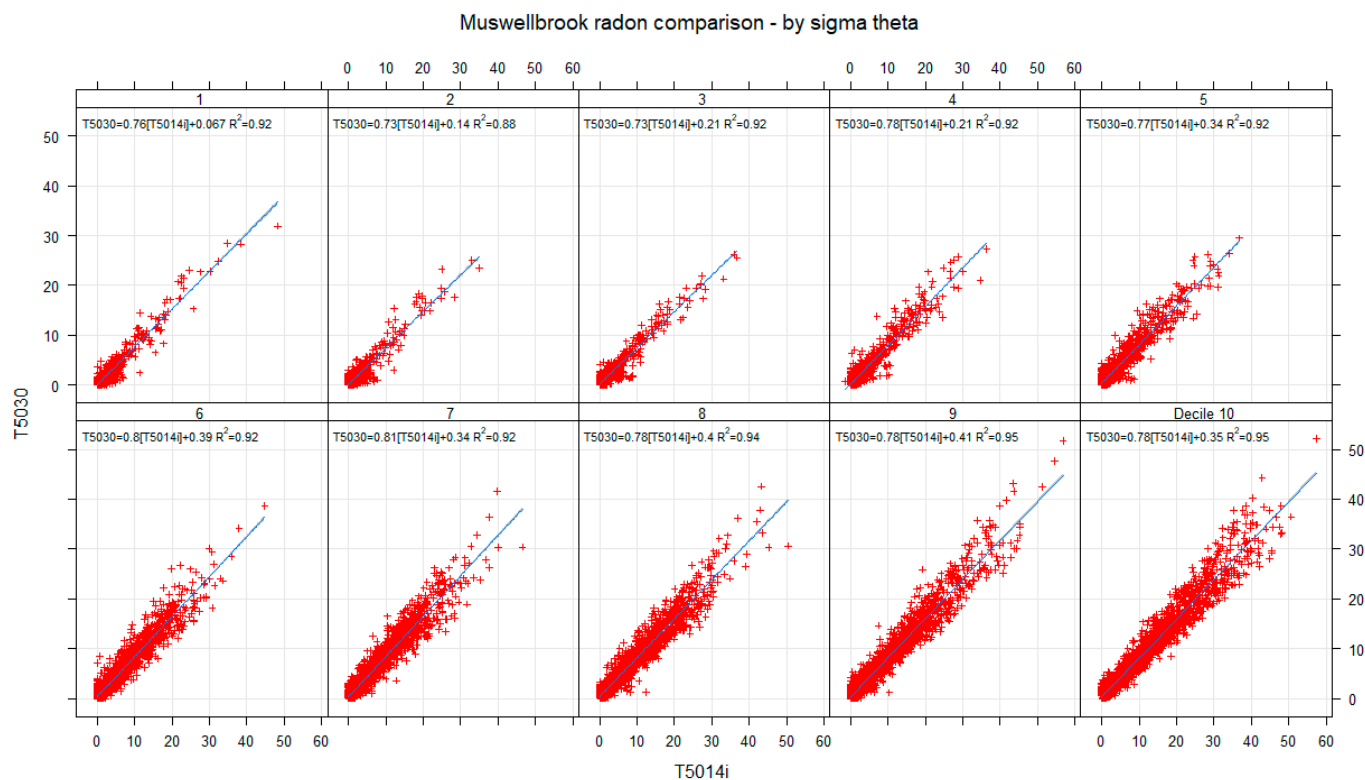

**Figure S19.** Correlations and linear regression modelling for sigma theta deciles 5030 vs 5014i.

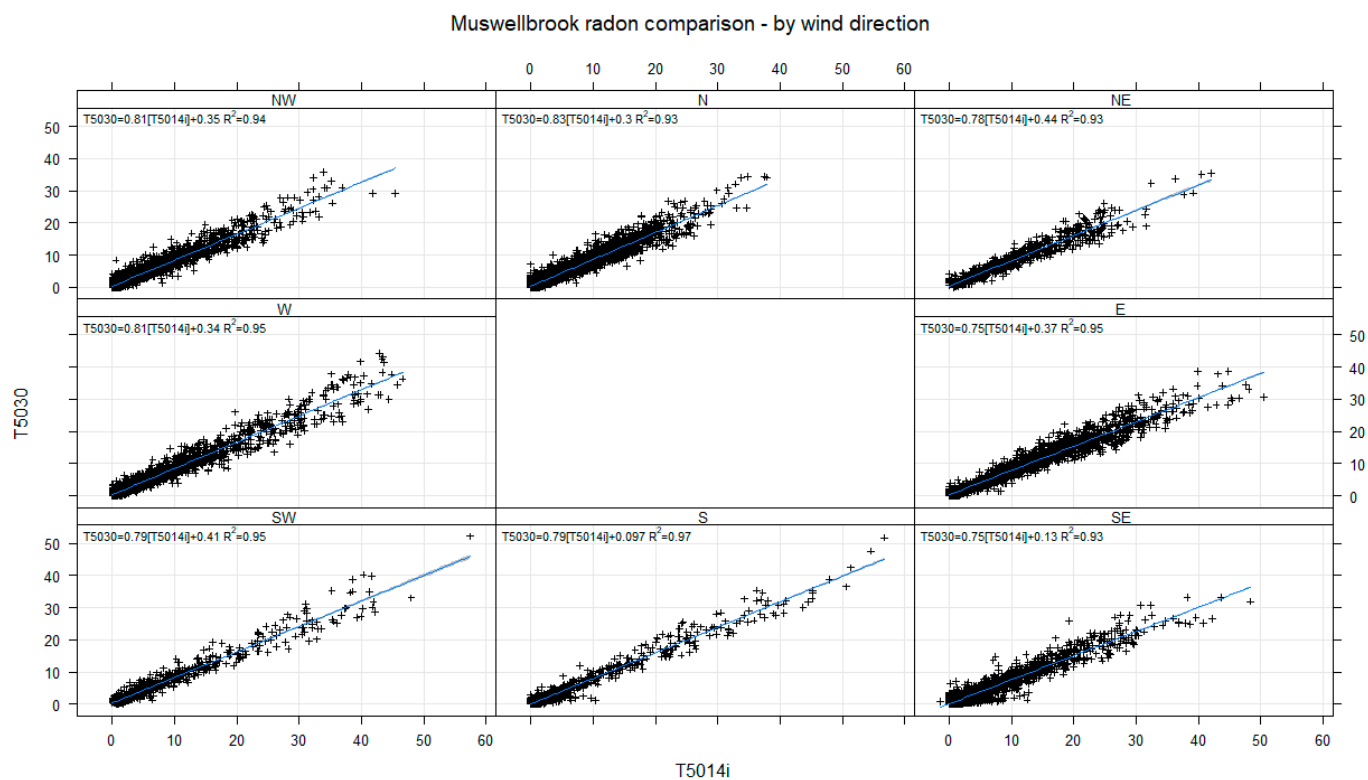

**Figure S20.** Correlations and linear regression modelling for wind direction 5030 vs 5014i.
